# Supplementary material for: Measuring compound flood potential from river discharge and storm surge extremes at the global scale
Source: Copernicus journal article supplement (doi:10.5194/nhess-20-489-2020), 2020-02-21
Supplement: Supplementary file 1 [file nhess-20-489-2020-supplement.zip]

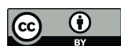

## *Supplement of*

# **Measuring compound flood potential from river discharge and storm surge extremes at the global scale**

Anaïs Couasnon et al.

*Correspondence to:* Anaïs Couasnon (anaïs.couasnon@vu.nl)

- nhess-20-489-2020-supplement-title-page.pdf
- Couasnon\_al\_2019\_CompoundFloodPotential\_Supplementary\_final.pdf
- FigS1.png
- FigS10.pdf
- FigS11.pdf
- FigS12.pdf
- FigS13.pdf
- FigS14.pdf
- FigS2.png
- FigS3.png
- FigS4.png
- FigS5.pdf
- FigS6.pdf
- FigS7.pdf
- FigS8.pdf
- FigS9.pdf

The copyright of individual parts of the supplement might differ from the CC BY 4.0 License.
