# Supplementary material for: Measuring compound flood potential from river discharge and storm surge extremes at the global scale
Source: Copernicus journal article supplement (doi:10.5194/nhess-20-489-2020), 2020-02-21
Supplement: Supplementary file 4 [file nhess-20-489-2020-supplement.zip]

Nb. of co-occurring AM

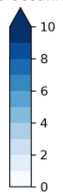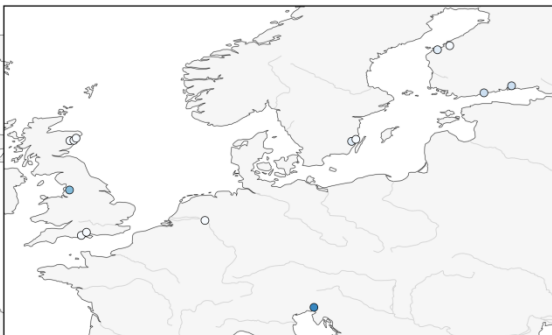

**(a) From observation stations**

Nb. of co-occurring AM

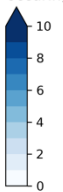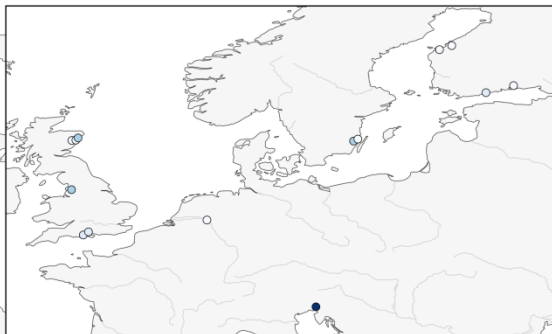

**(b) From the simulated variables**
