# Supplementary figures and images for: Measuring compound flood potential from river discharge and storm surge extremes at the global scale
Source: Copernicus journal article supplement (doi:10.5194/nhess-20-489-2020), 2020-02-21

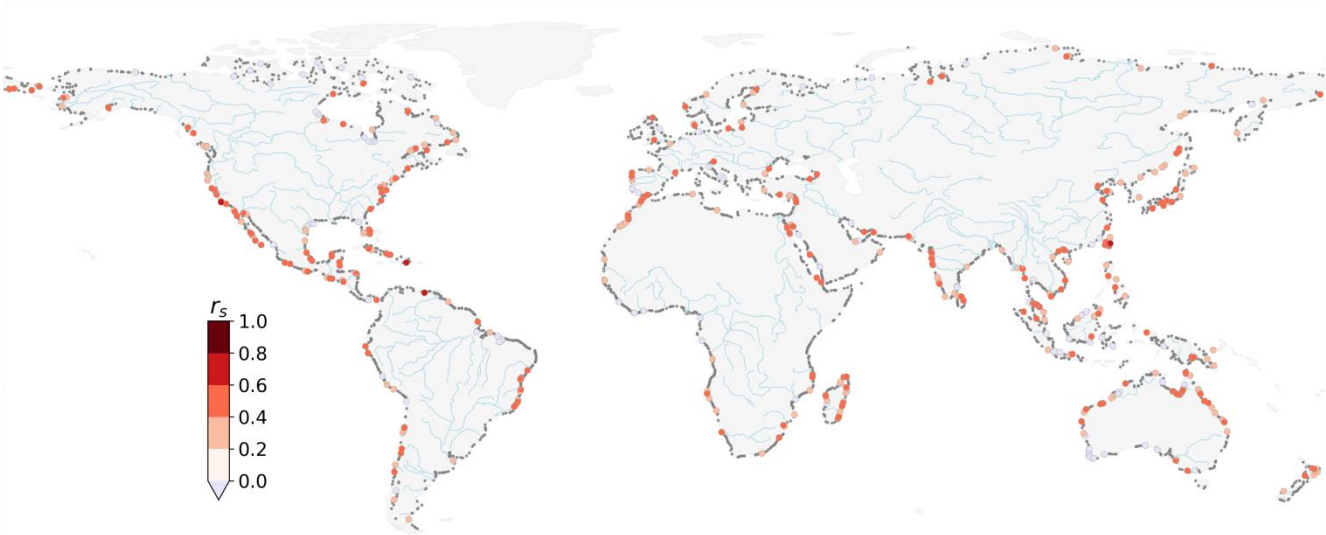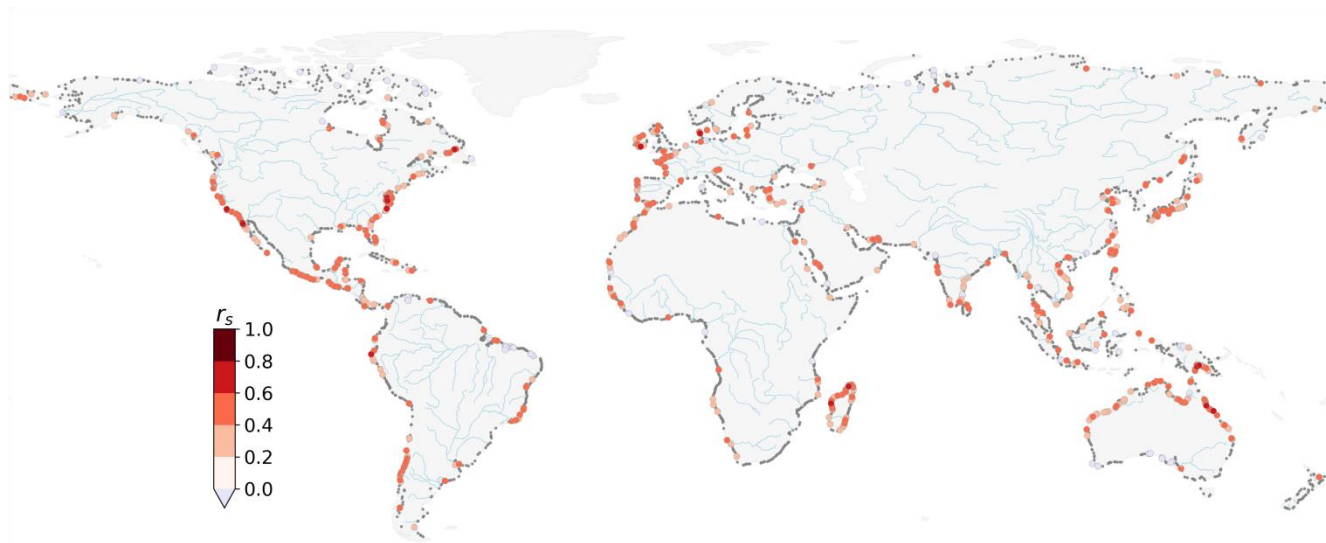

Supplement: Supplementary file 2 [file nhess-20-489-2020-supplement.zip]

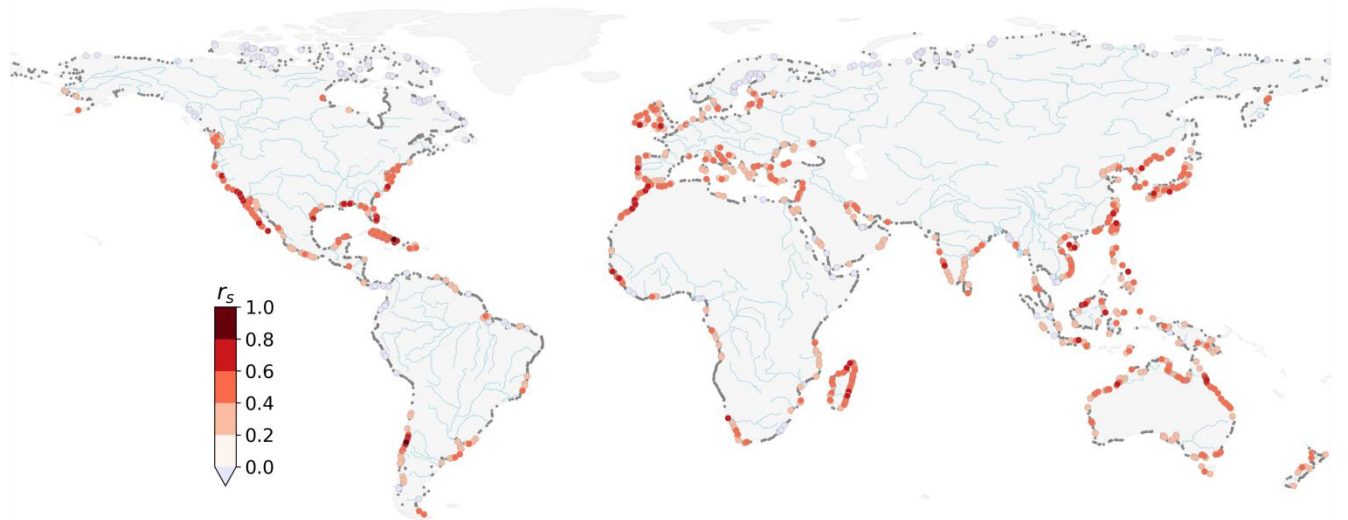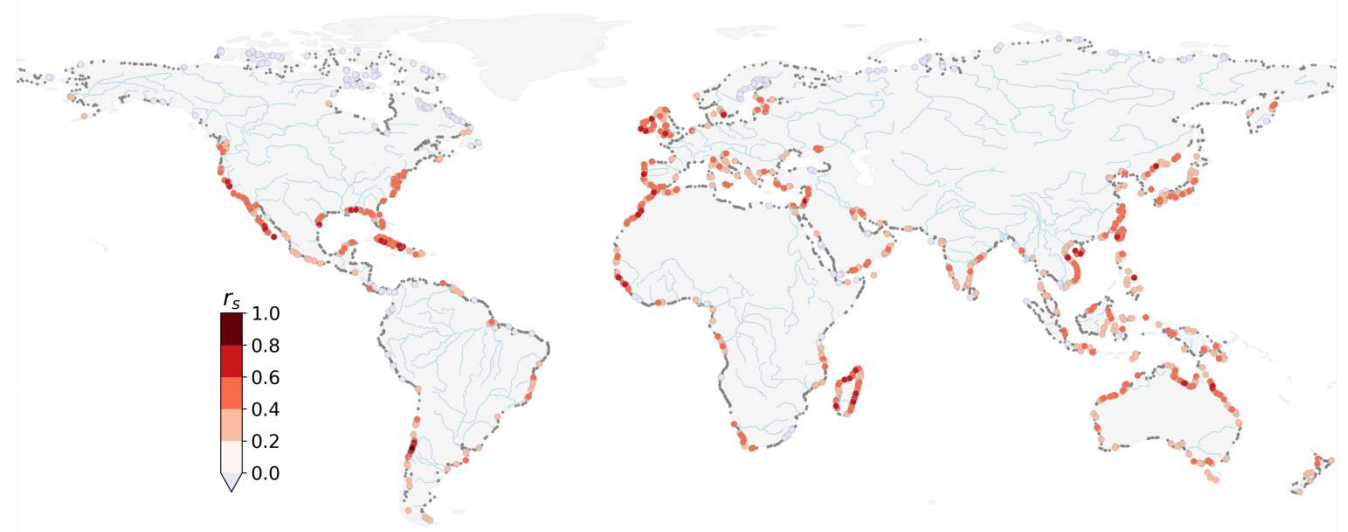

Supplement: Supplementary file 3 [file nhess-20-489-2020-supplement.zip]

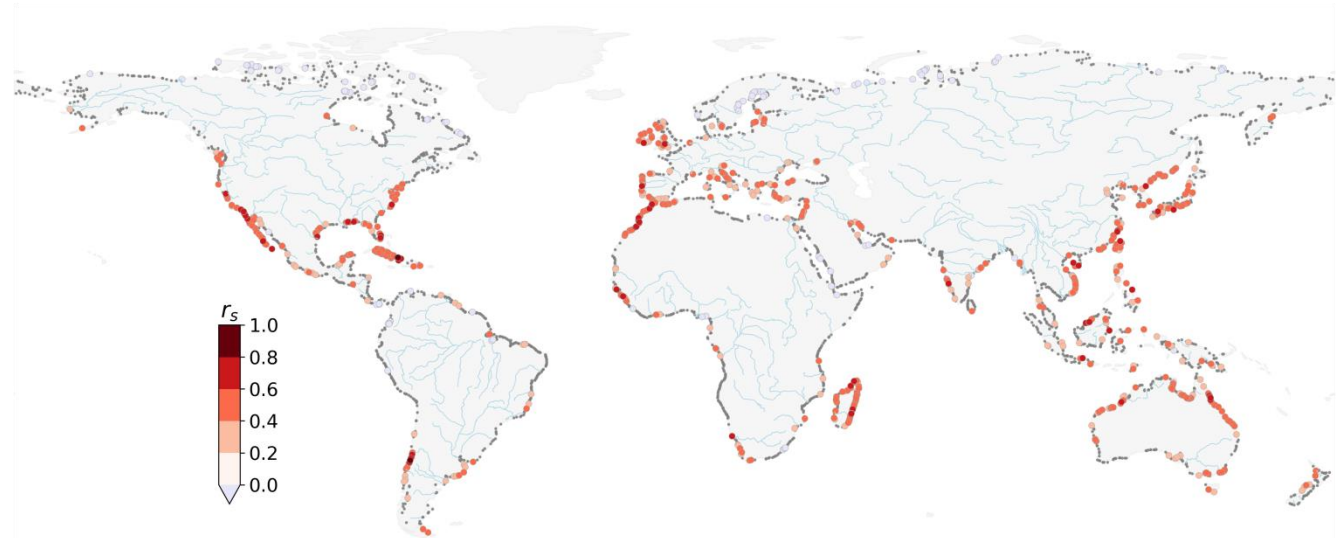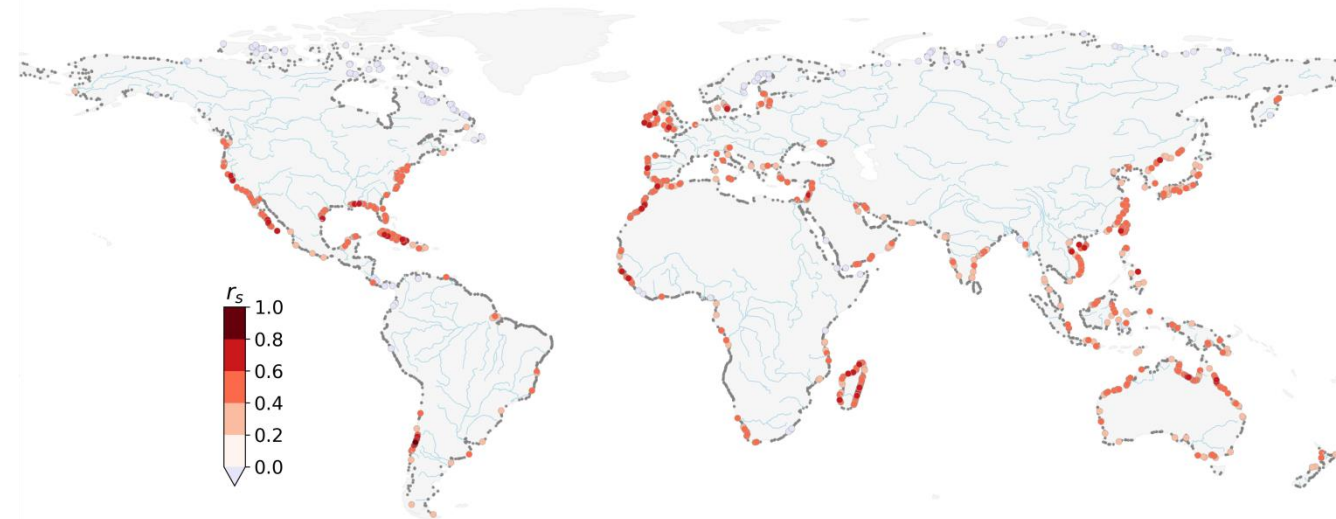

Supplement: Supplementary file 5 [file nhess-20-489-2020-supplement.zip]

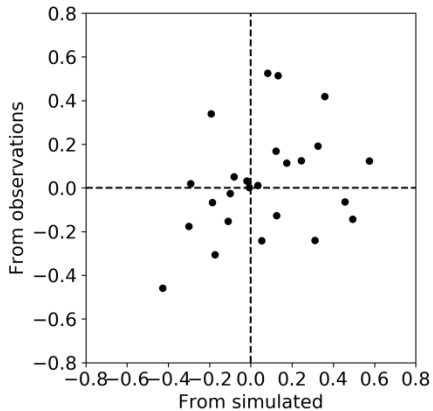

(a)

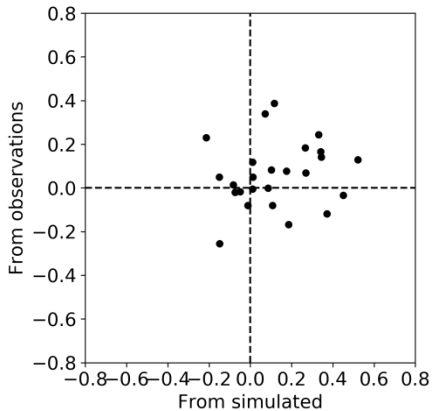

(b)

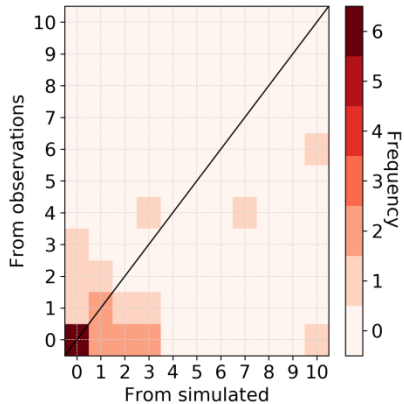

(c)

Supplement: Supplementary file 7 [file nhess-20-489-2020-supplement.zip]

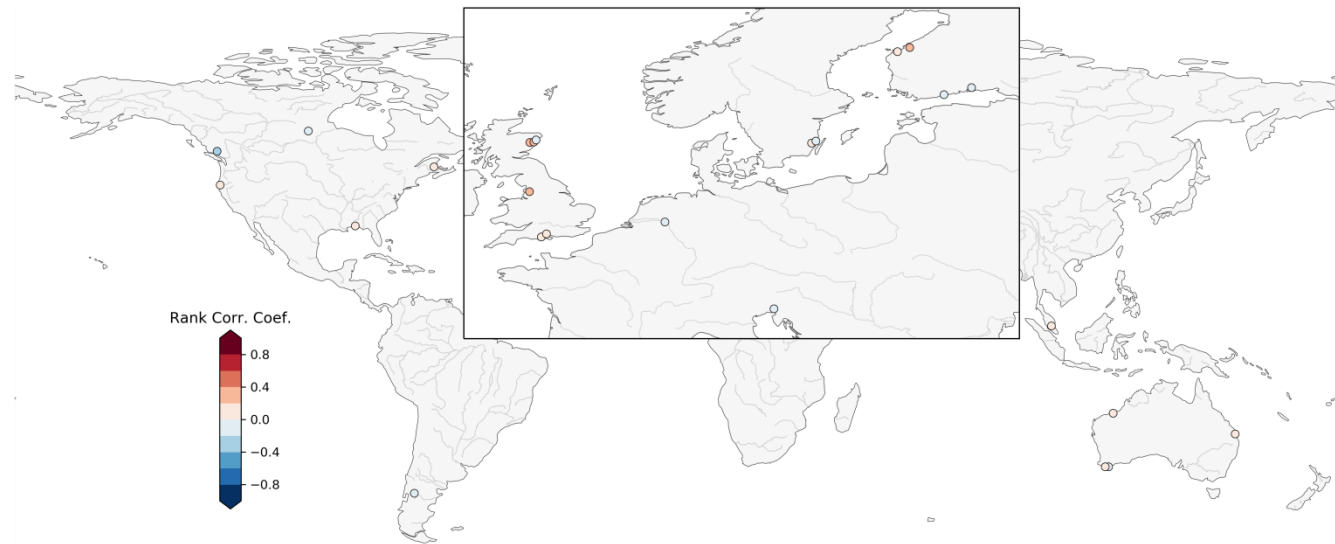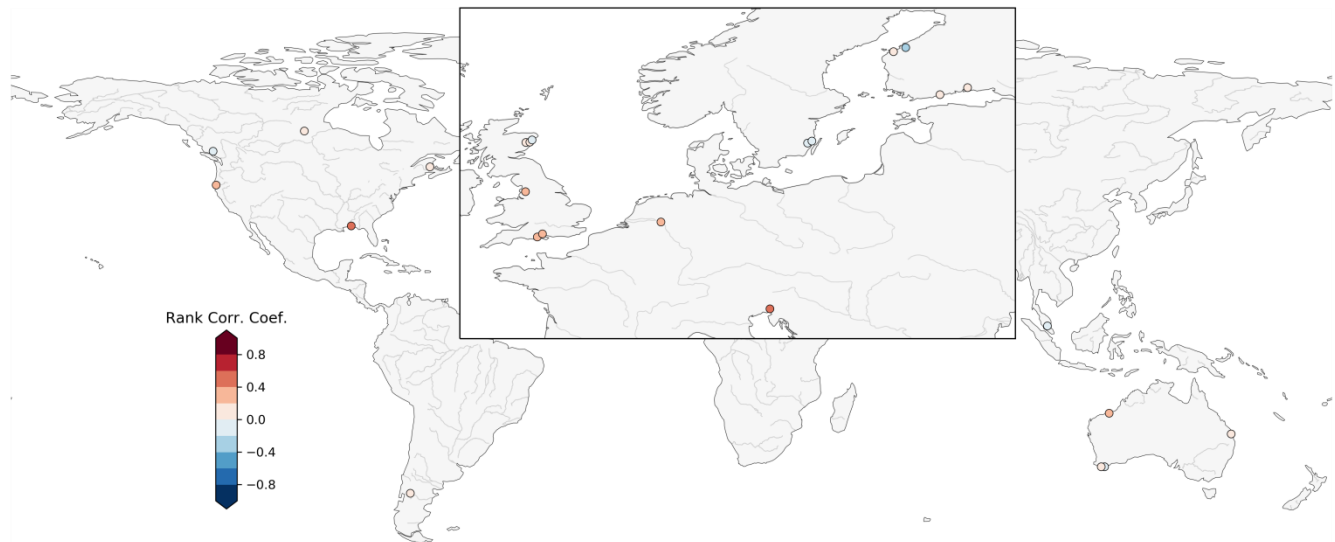

Supplement: Supplementary file 8 [file nhess-20-489-2020-supplement.zip]

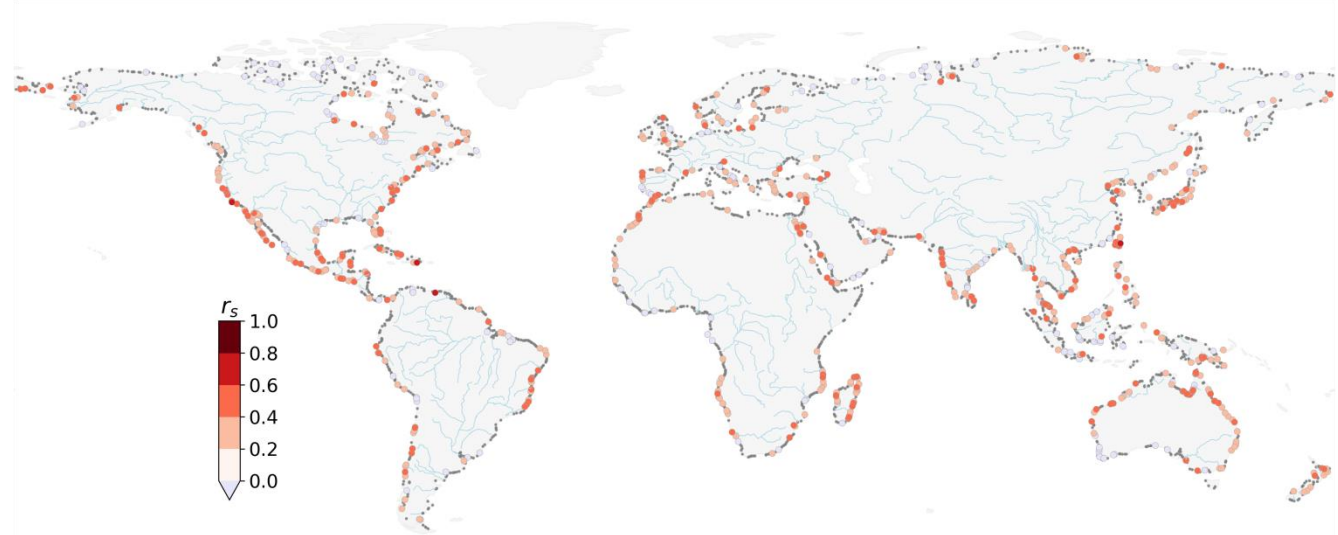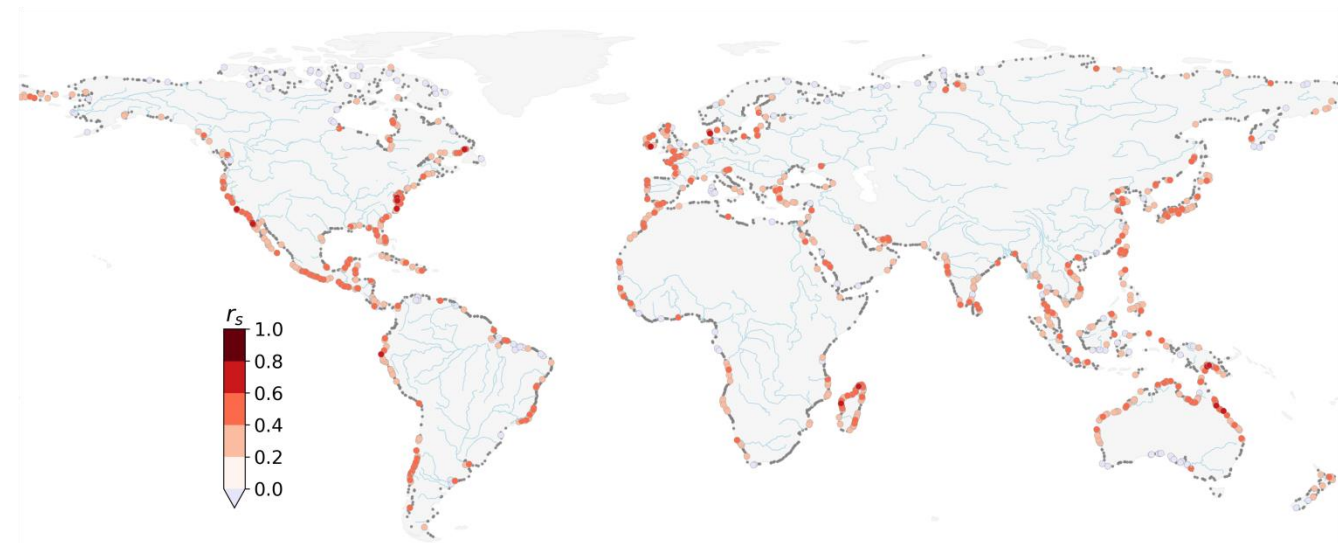

Supplement: Supplementary file 9 [file nhess-20-489-2020-supplement.zip]

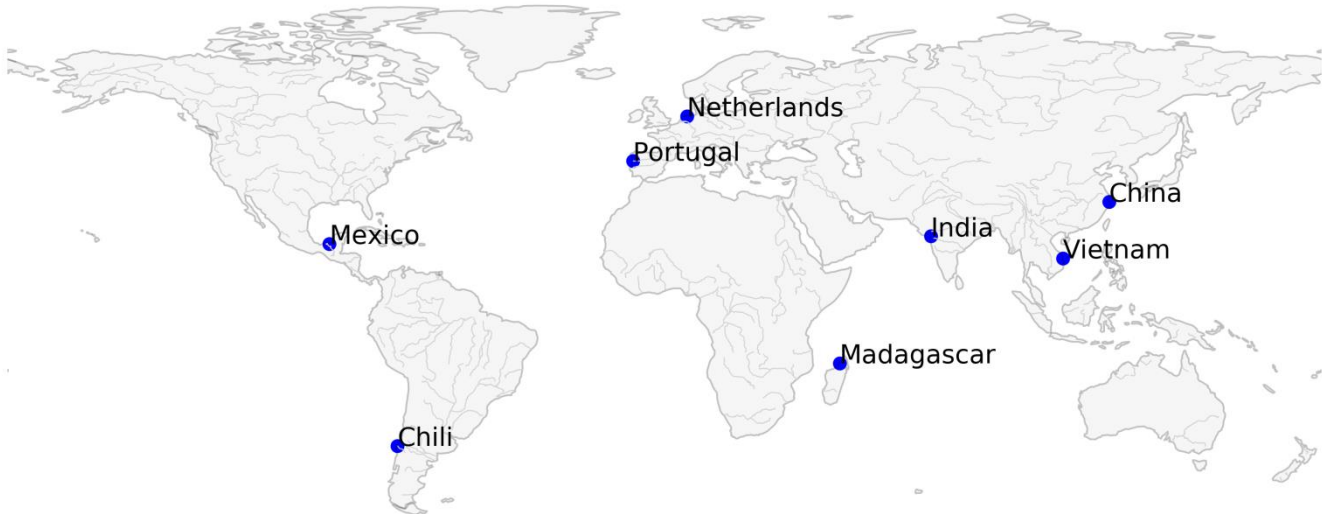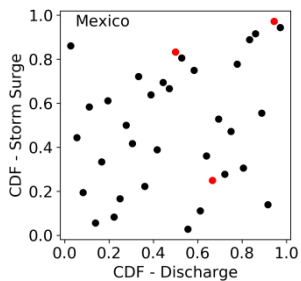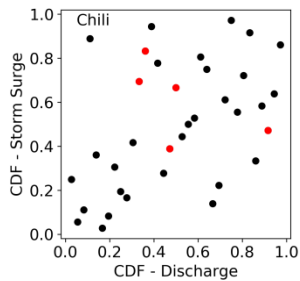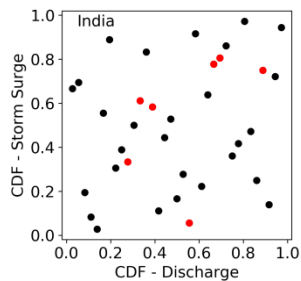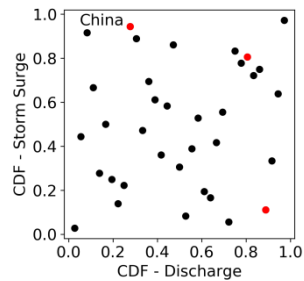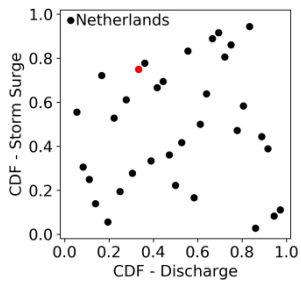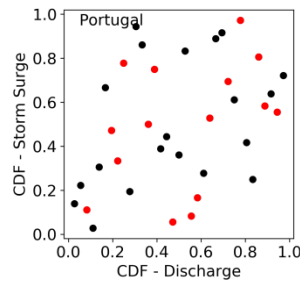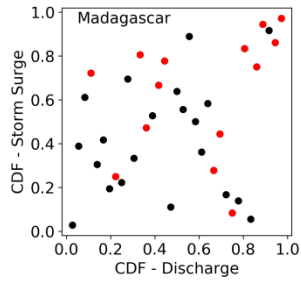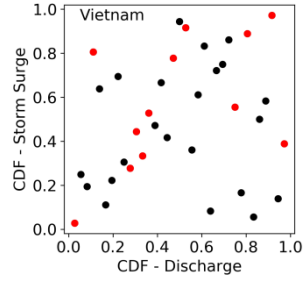

Supplement: Supplementary file 10 [file nhess-20-489-2020-supplement.zip]

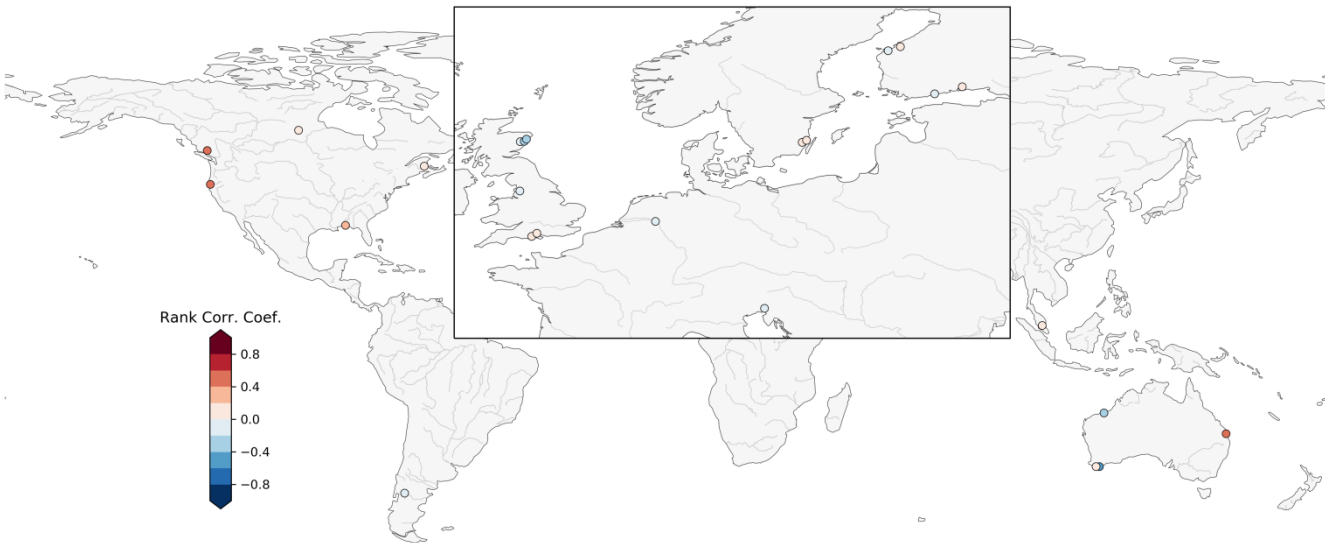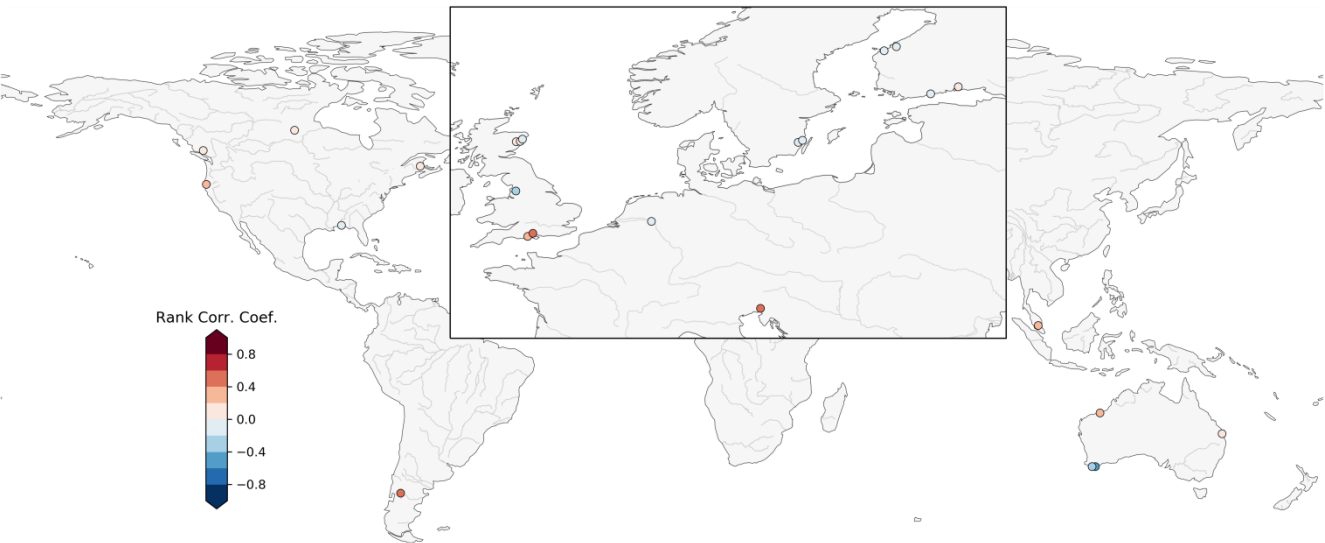

Supplement: Supplementary file 11 [file nhess-20-489-2020-supplement.zip]

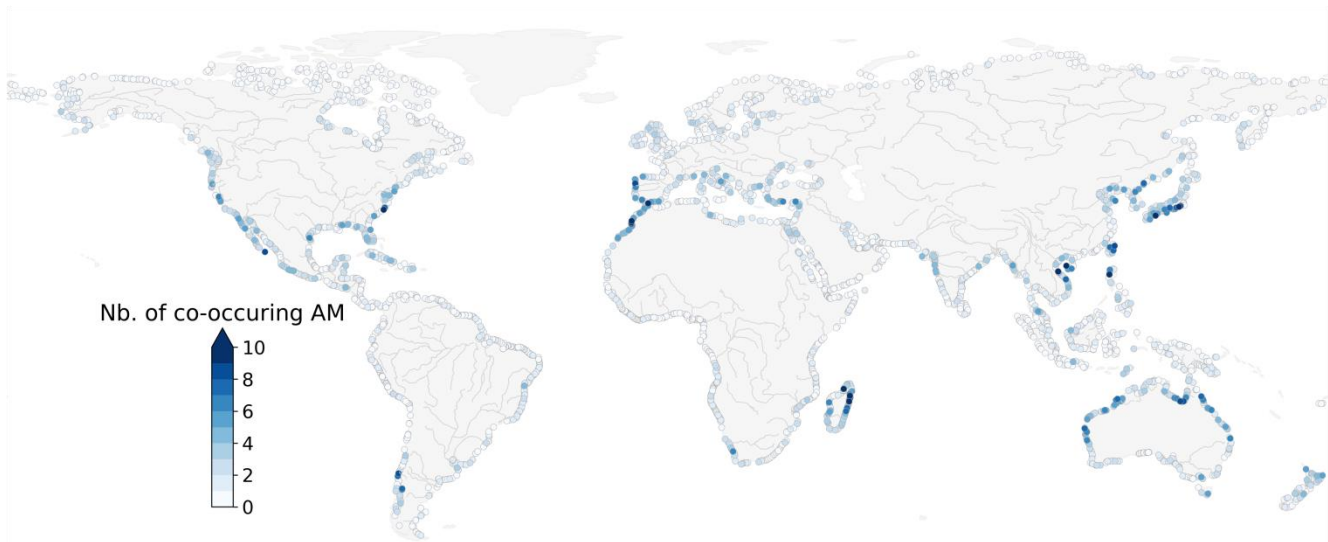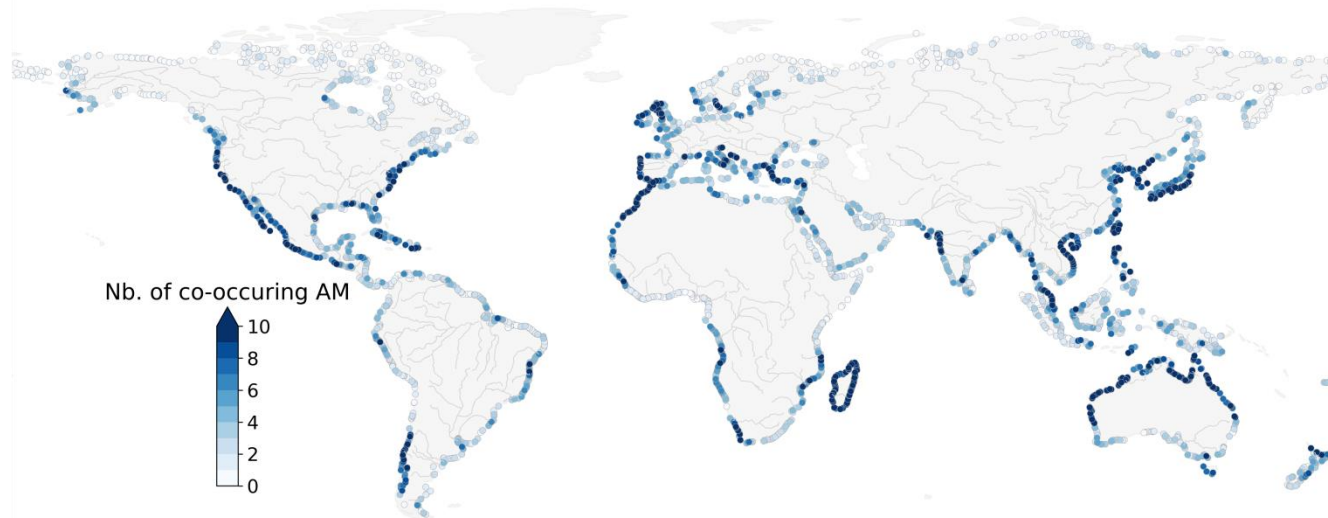

Supplement: Supplementary file 12 [file nhess-20-489-2020-supplement.zip]
